# Supplementary material for: Modern Methods for the Sustainable Synthesis of Metalloporphyrins
Source: MDPI journal article supplement (doi:10.3390/molecules26216652), 2021-11-02
Supplement: s1 [file s1]

## Supplementary Materials

### Modern methods for the sustainable synthesis of metalloporphyrins

Carla Gomes<sup>1</sup>, Mariana Peixoto<sup>1</sup>, Marta Pineiro<sup>1,\*</sup>

<sup>1</sup> University of Coimbra, Department of Chemistry and CQC, Rua Larga 3004-535, Coimbra, Portugal; carla\_sofia.gomes@live.com.pt; [mariana.silva.fp@gmail.com](mailto:mariana.silva.fp@gmail.com); mpineiro@qui.uc.pt

\* Correspondence: mpineiro@qui.uc.pt

#### 1. 1. Characterization of the synthesized metalloporphyrins

**Zn(II) 5,10,15,20-tetrakis-(3,4-dimethoxyphenyl)porphyrinate**, Yield = 97%; UV-Vis ( $C_4H_8O_2$ ):  $\lambda_{max}$ , nm (relative absorbance, %) = 426 (100), 551 (17.6), 590 (5.9);  $^1H$ -RMN (400 MHz,  $CDCl_3$ ),  $\delta$  (ppm) = 9.01 (8H, s, H-pyrrole), 7.79–7.76 (8H, m, Ph), 7.27 (4H, d, Ph), 4.19 (12H, s,  $OCH_3$ ), 3.98 (12H, s,  $OCH_3$ ). Characterization in accordance with previously reported [1].

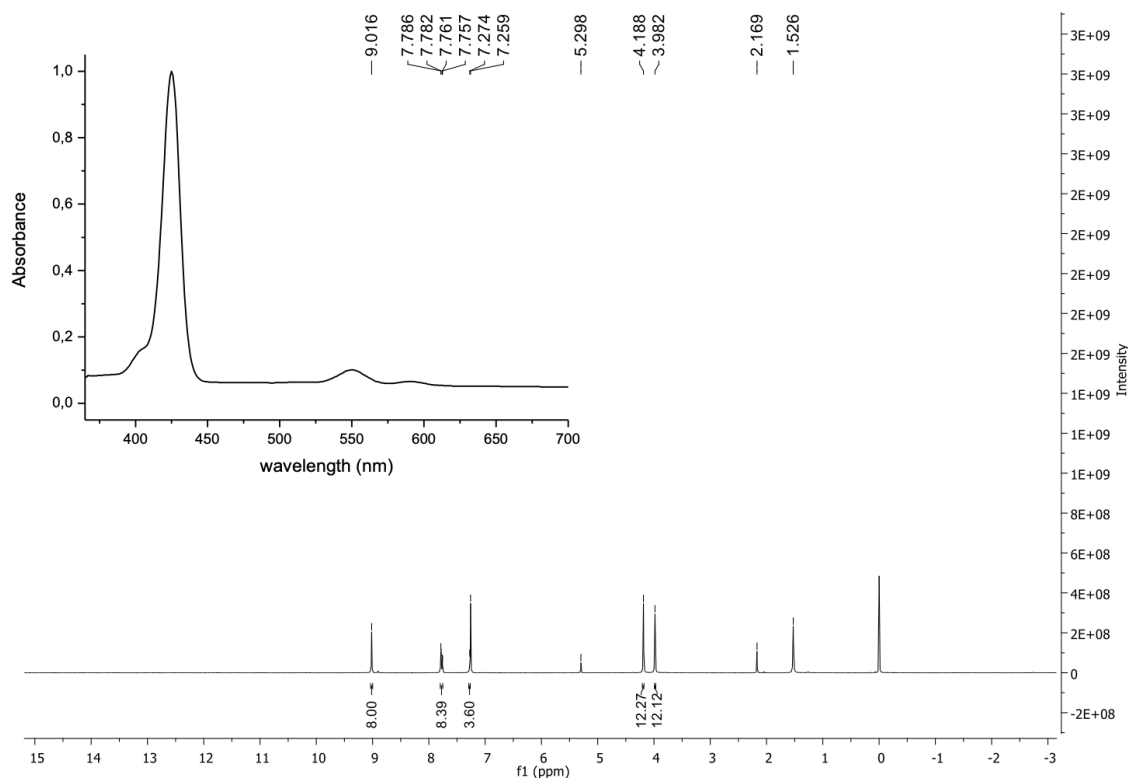

Figure S1. UV-Vis and  $^1H$ -NMR spectra of Zn(II) 5,10,15,20-tetrakis-(3,4-dimethoxyphenyl)porphyrinate

**Cu(II) 5,10,15,20-tetrakis-(N-methyl-4-pyridinyl)porphyrinate tetraiodide**, Yield: 53%; UV-Vis (H<sub>2</sub>O):  $\lambda_{\text{max}}$ , nm (relative absorbance, %) = 425 (100), 548 (15.6). Characterization in accordance with previously reported [2].

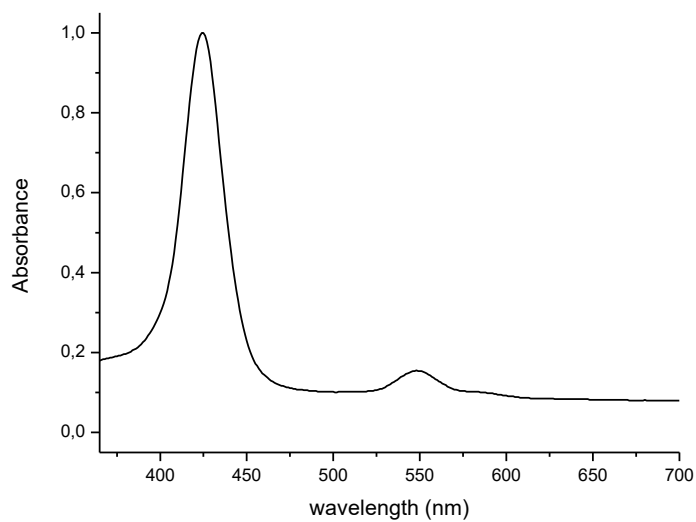

Figure S2. UV-Vis of Cu(II) 5,10,15,20-tetrakis-(N-methyl-4-pyridinyl)porphyrinate tetraiodide.

**Cu(II) 5,10,15,20-tetrakis-(3,4-dimethoxyphenyl)porphyrinate**, Yield = 84%; UV-Vis ( $C_4H_8O_2$ ):  $\lambda_{max}$ , nm (relative absorbance, %) = 421 (100), 541 (50.8), HRMS (ESI);  $m/z$  = 915.2444 ( $[M+H]^+$ ) calculated for 915.2450 ( $C_{52}H_{45}CuN_4O_8$ ). Characterization in accordance with previously reported [1].

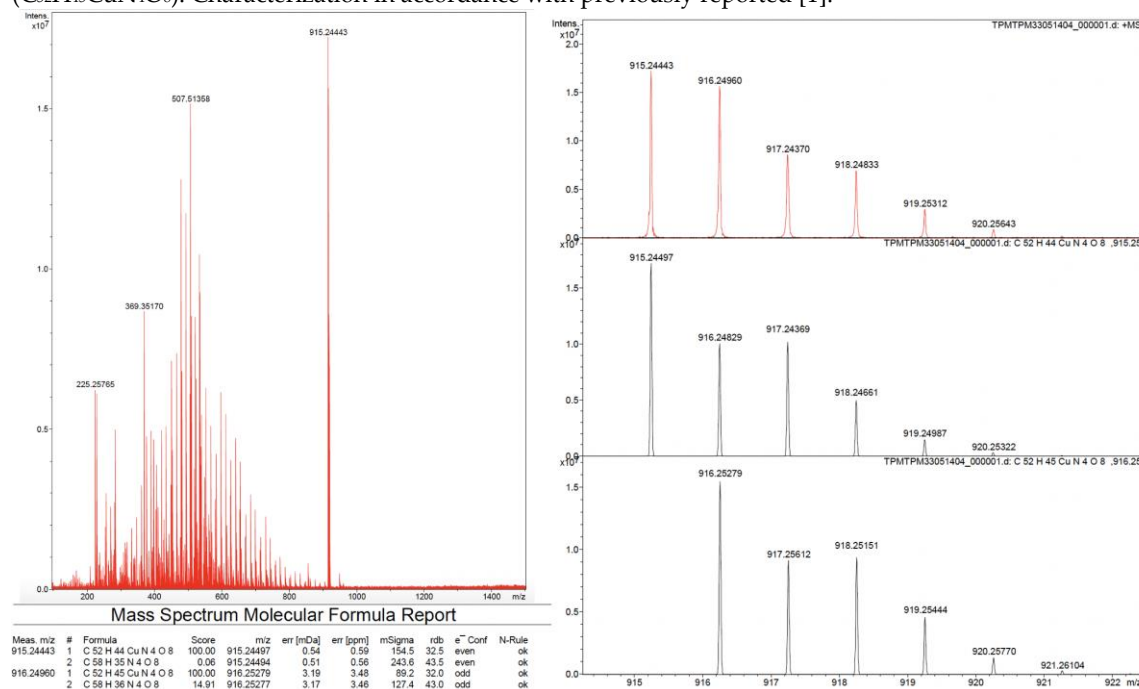

Figure S3. UV-Vis and HRMS of Cu(II) 5,10,15,20-tetrakis-(3,4-dimethoxyphenyl)porphyrinate.

**Co(III) 5,10,15,20-tetrakis-(3,4-dimethoxyphenyl)porphyrinate acetate**, Yield = 61%; UV-Vis (CH<sub>2</sub>Cl<sub>2</sub>):  $\lambda_{\text{max}}$ , nm (relative absorbance, %) = 420 (100), 527 (13.4). Characterization in accordance with previously reported [1].

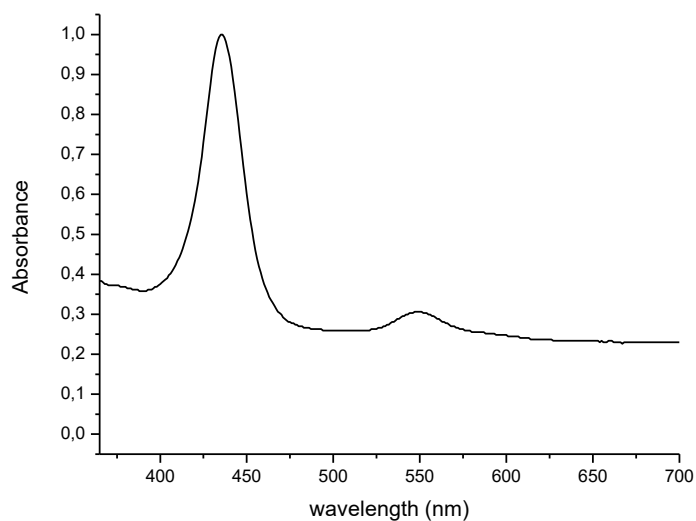

Figure S4. UV-Vis of Co(III) 5,10,15,20-tetrakis-(3,4-dimethoxyphenyl)porphyrinate acetate.

**Mn(III) 5,10,15,20-(3,4-dimethoxyphenyl)porphyrinate acetate**, Yield = 30%; UV-Vis (CH<sub>2</sub>Cl<sub>2</sub>):  $\lambda_{\text{max}}$ , nm (relative absorbance, %) = 482 (100), 586 (14.3), 625 (16.9); HRMS (ESI);  $m/z$  = 907.25101 (M<sup>+</sup>) calculated for 907.25342 (C<sub>52</sub>H<sub>44</sub>MnN<sub>4</sub>O<sub>8</sub>).

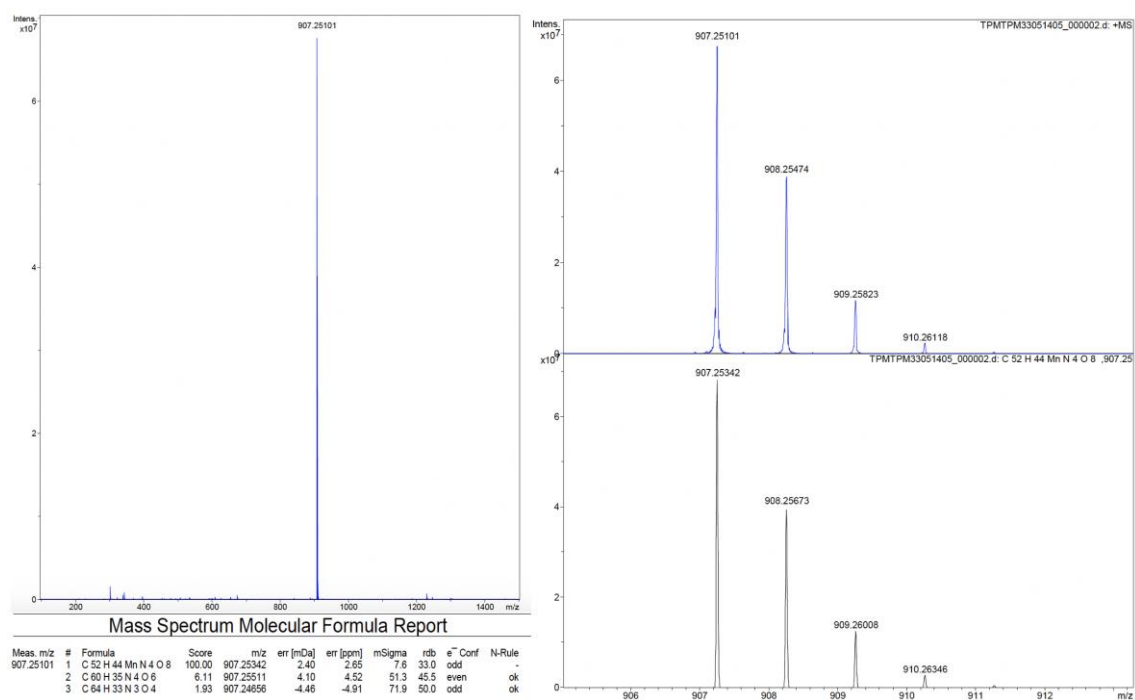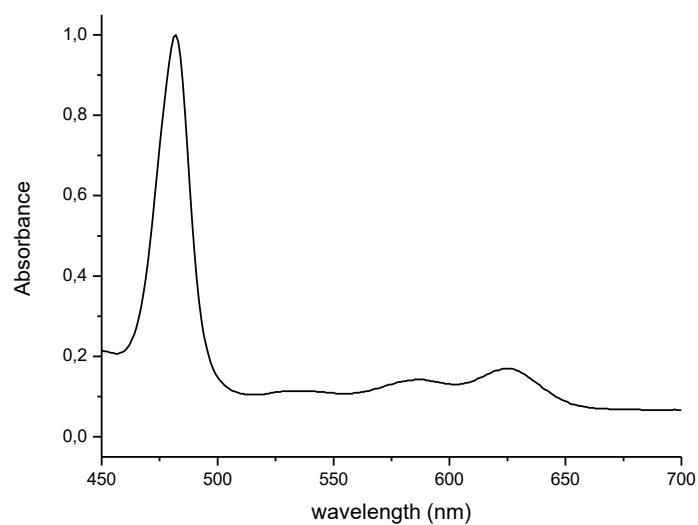

Figure S5. UV-Vis and HRMS spectra of Mn(III) 5,10,15,20-(3,4-dimethoxyphenyl)porphyrinate acetate.

**Pd(II) 5,10,15,20-tetrakis-(3,4-dimethoxyphenyl)porphyrinate**, Yield = 70%; UV-Vis (CH<sub>2</sub>Cl<sub>2</sub>):  $\lambda_{\text{max}}$ , nm (relative absorbance, %) = 422 (100), 525 (9.2); <sup>1</sup>H-RMN (400 MHz, CDCl<sub>3</sub>),  $\delta$  (ppm) = 8.87 (8H, s, H-pyrrole), 7.73 – 7.71 (8H, m, Ph), 7.25 (4H, d, Ph), 4.17 (12H, s, OCH<sub>3</sub>), 3.97 (12H, s, OCH<sub>3</sub>).

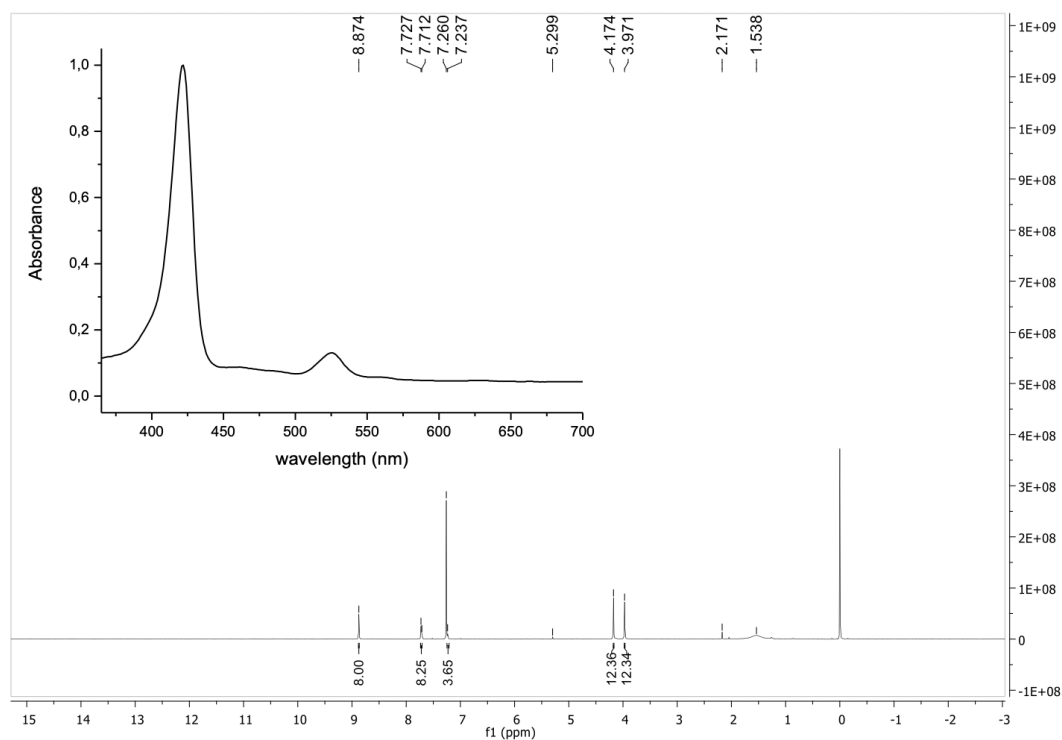

Figure S6. UV-Vis and <sup>1</sup>H-NMR spectra of Pd(II) 5,10,15,20-tetrakis-(3,4-dimethoxyphenyl)porphyrinate.

**Pt(II) 5,10,15,20-(*tetrakis*-3,4-dimethoxyphenyl)porphyrinate**, Yield = 50%\*; UV-Vis (CH<sub>2</sub>Cl<sub>2</sub>):  $\lambda_{\text{max}}$ , nm (relative absorbance, %) = 424 (100), 541 (50.8); <sup>1</sup>H-RMN (400 MHz, CDCl<sub>3</sub>),  $\delta$  (ppm) = 8.83 (8H, s, H-pyrrole), 7.63 – 7.61 (8H, m, Ph), 7.19 - 7.15 (4H, m, Ph), 4.18 (12H, s, OCH<sub>3</sub>), 4.01 (12H, s, OCH<sub>3</sub>). \*Calculated by NMR.

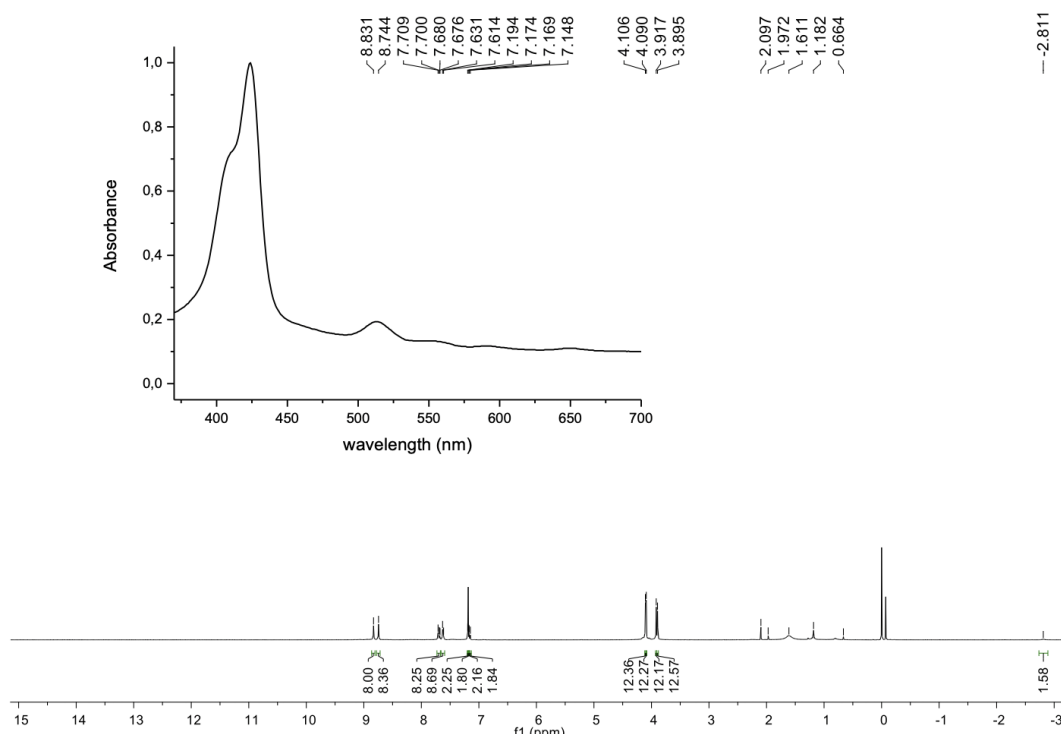

Figure S7. UV-Vis and <sup>1</sup>H-NMR spectra of Pt(II) 5,10,15,20-*tetrakis*-(3,4-dimethoxyphenyl)porphyrinate.

**Cu(II) 5,10,15,20-tetraphenylporphyrinate**, Yield = 75%; UV-Vis (C<sub>4</sub>H<sub>8</sub>O<sub>2</sub>):  $\lambda_{\text{max}}$ , nm (relative absorbance, %) = 421 (100), 541 (50.8); HRMS (ESI);  $m/z$  = 675.1593 (M<sup>+</sup>) calculated for 675.1605 (C<sub>44</sub>H<sub>28</sub>CuN<sub>4</sub>). Characterization in accordance with previously reported [3, 4].

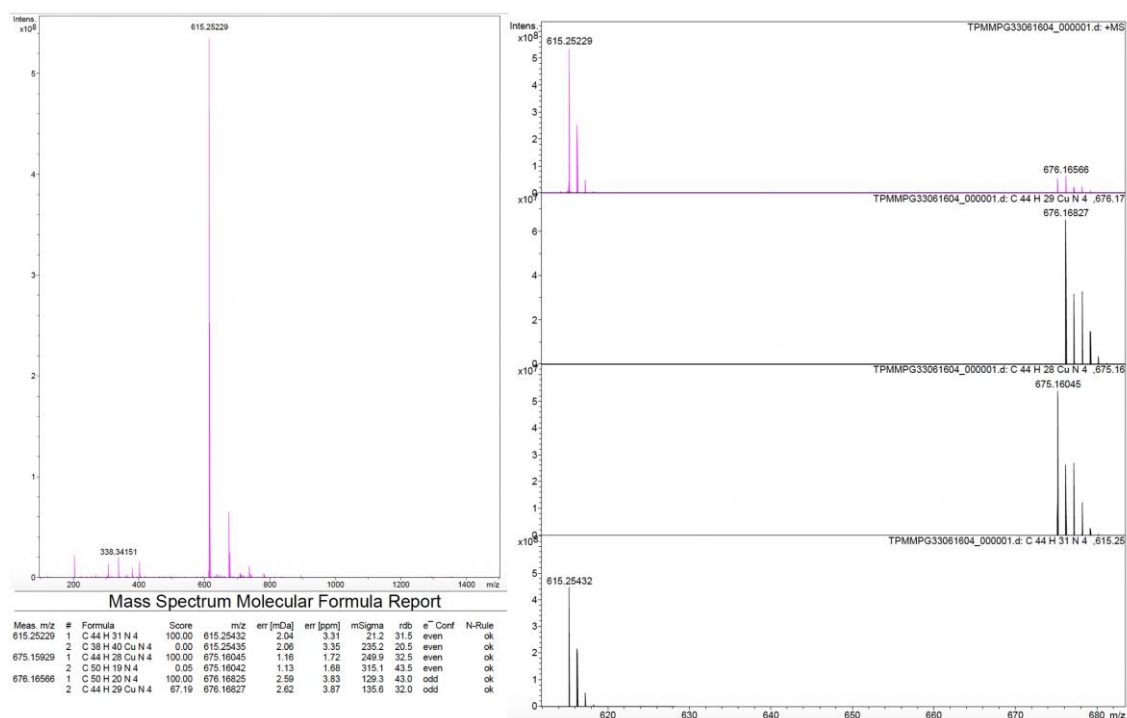

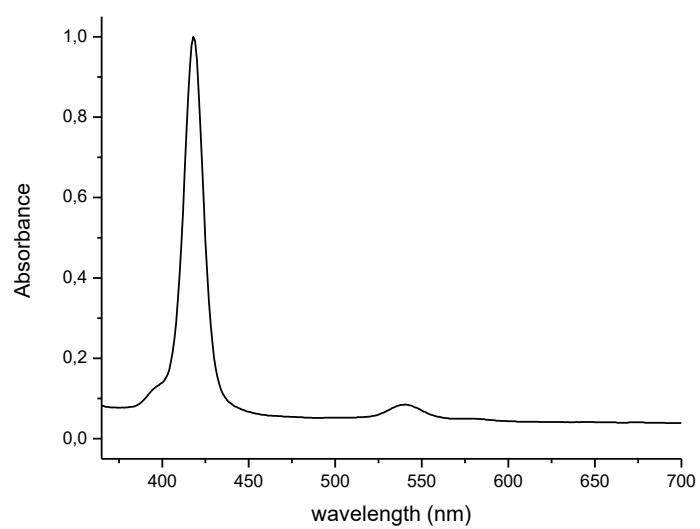

Figure S8. UV-Vis and HRMS of Cu(II) 5,10,15,20-tetraphenylporphyrinate.



**Cu(II) 5,10,15,20-tetrakis-(3,5-dimethoxyphenyl)porphyrinate**, Yield = 89%; UV-Vis ( $C_4H_8O_2$ ):  $\lambda_{max}$ , nm (relative absorbance, %) = 417 (100), 538 (4.3); HRMS (ESI);  $m/z$  = 916.2508 ( $[M+H]^+$ ) calculated for 916.2530 ( $C_{52}H_{45}CuN_4O_8$ ). Characterization in accordance with previously reported [5].

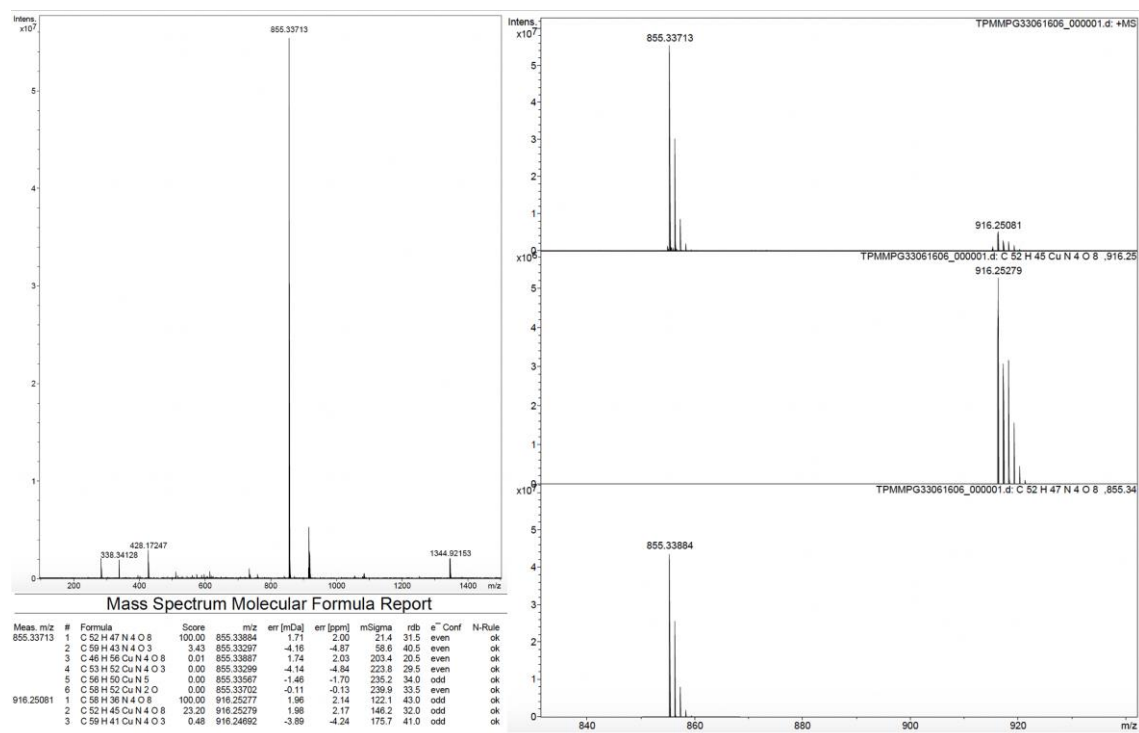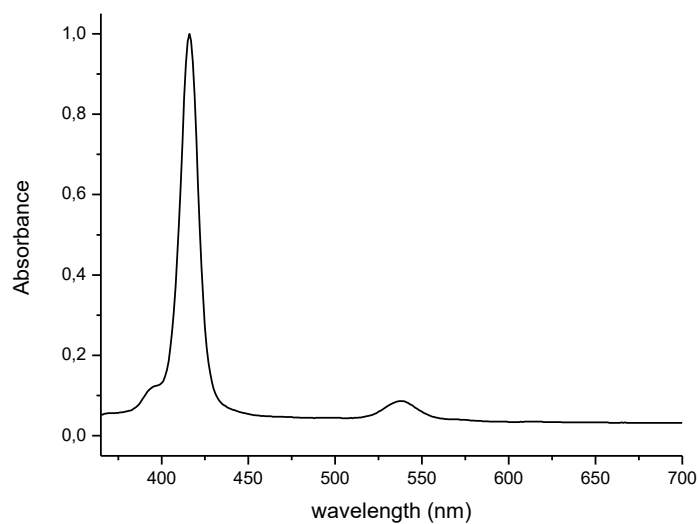

Figure S9. UV-Vis and HRMS of Cu(II) 5,10,15,20-tetrakis-(3,5-dimethoxyphenyl)porphyrinate.

**Cu(II) 5,10,15,20-tetrakis-(3,4,5-trimethoxyphenyl)porphyrinate**, Yield = 88%; UV-Vis (C<sub>2</sub>H<sub>3</sub>N):  $\lambda_{\text{max}}$ , nm (relative absorbance, %) = 416 (100), 536 (5); HRMS (ESI); m/z = 1035.2850 (M<sup>+</sup>) calculated for 1035.2872 (C<sub>56</sub>H<sub>52</sub>CuN<sub>4</sub>O<sub>12</sub>). Characterization in accordance with previously reported [6].

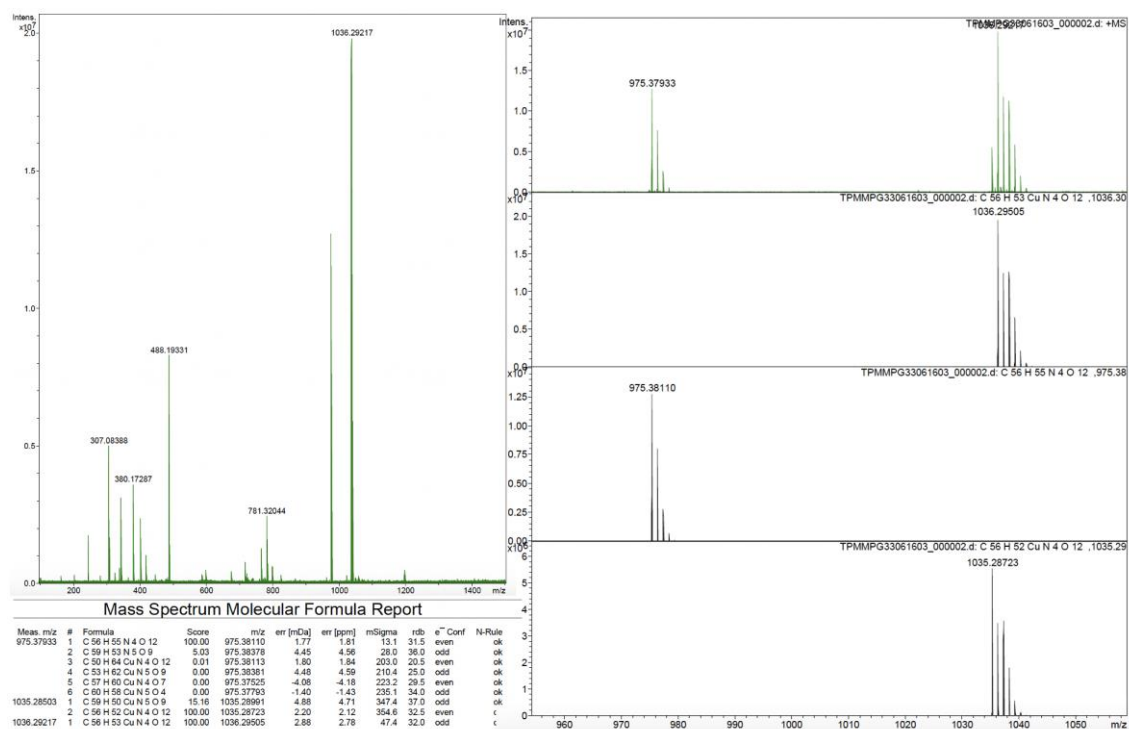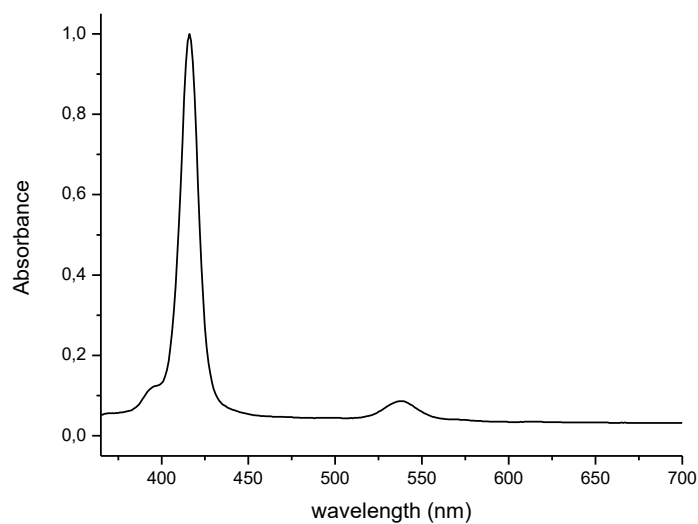

Figure S10. UV-Vis and HRMS of Cu(II) 5,10,15,20-tetrakis-(3,4,5-trimethoxyphenyl)porphyrinate.

**Cu(II) 5,10,15,20-tetrakis-(3-hydroxyphenyl)porphyrinate**, Yield = 74%; UV-Vis (CH<sub>3</sub>OH):  $\lambda_{\text{max}}$ , nm (relative absorbance, %) = 414 (100), 537 (6.2). Characterization in accordance with previously reported [6, 7].

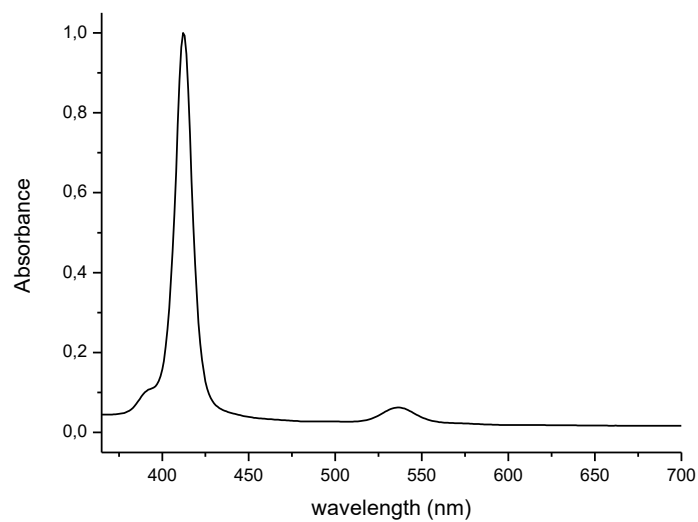

Figure S11. UV-Vis of Cu(II) 5,10,15,20-tetrakis-(3-hydroxyphenyl)porphyrinate.

**Cu(II) 5,10,15,20-tetrakis-(3-hydroxyphenyl-4-methoxyphenyl)porphyrinate**, Yield = 90%; UV-Vis ( $C_4H_8O_2$ ):  $\lambda_{max}$ , nm (relative absorbance, %) = 405 (100), 481 (34.4), 530 (5.4); HRMS (ESI);  $m/z$  = 859.1817 ( $M^+$ ) calculated for 859.1824 ( $C_{48}H_{36}CuN_4O_8$ ). Characterization in accordance with previously reported [8].

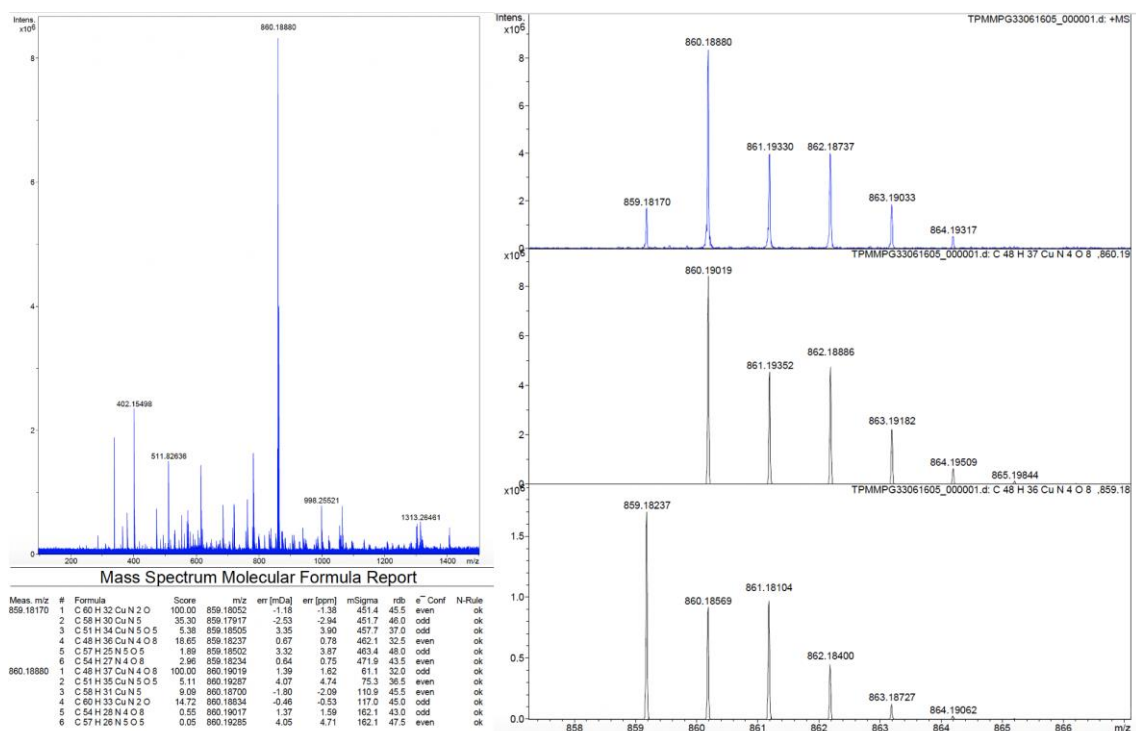

Figure S12. UV-Vis and HRMS of Cu(II) 5,10,15,20-tetrakis-(3-hydroxyphenyl-4-methoxyphenyl)porphyrinate.

**Cu(II) 5,10,15,20-tetrakis-(3,5-dichlorophenyl)porphyrinate**, Yield = 97%; UV-Vis ( $C_4H_8O_2$ ):  $\lambda_{max}$ , nm (relative absorbance, %) = 415 (100), 539 (5.6), 587 (2.2); HRMS (ESI);  $m/z$  = 947.8553 ( $[M+H]^+$ ) calculated for 947.8565 ( $C_{44}H_{21}Cl_8CuN_4$ ).

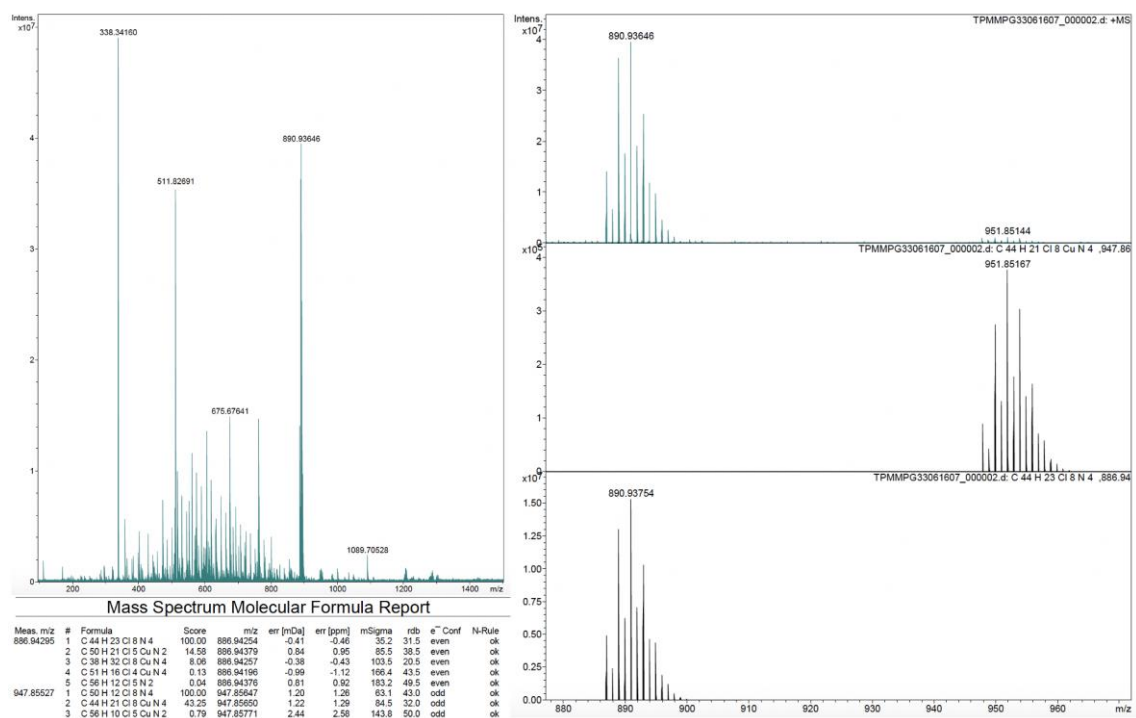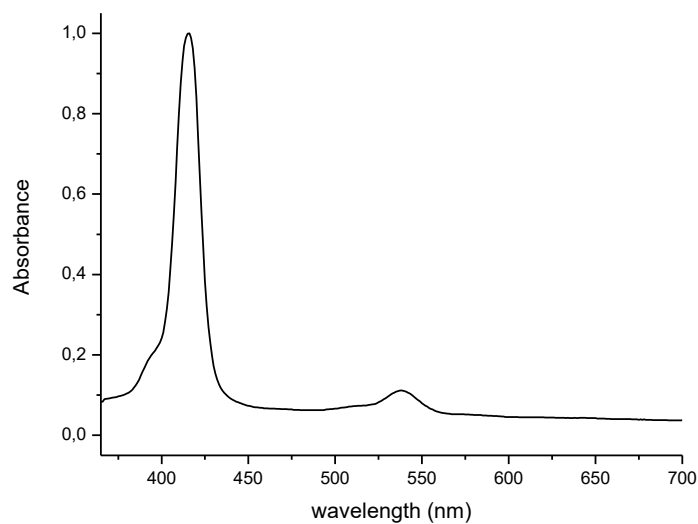

Figure S13. UV-Vis and HRMS of Cu(II) 5,10,15,20-tetrakis-(3,5-dichlorophenyl)porphyrinate.

**Cu(II) 5,10,15,20-tetrakis-(3-nitrophenyl)porphyrinate**, Yield = 70%; UV-Vis (CH<sub>2</sub>Cl<sub>2</sub>):  $\lambda_{\text{max}}$ , nm (relative absorbance, %) = 418 (100), 539 (14.9). Characterization in accordance with previously reported [9].

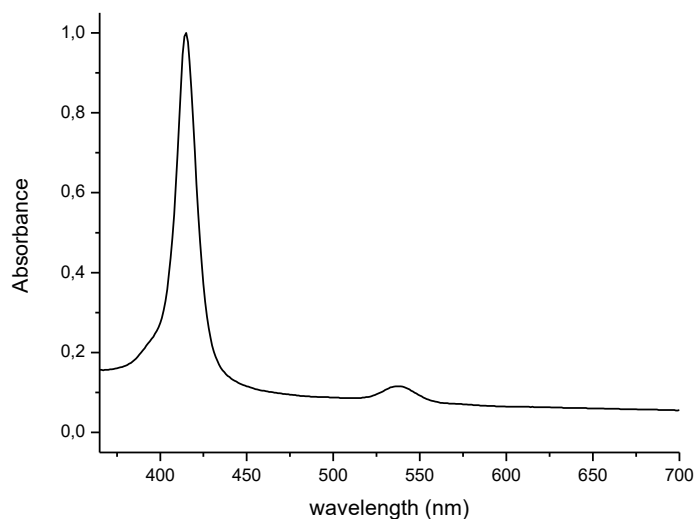

Figure S14. UV-Vis and of Cu(II) 5,10,15,20-tetrakis-(3-nitrophenyl)porphyrinate.

**Zn(II) 5,10,15,20-tetrakis-(N-methyl-4-pyridinyl)porphyrinate tetraiodide**, Yield = 90%; UV-Vis (H<sub>2</sub>O):  $\lambda_{\text{max}}$ , nm (relative absorbance, %) = 436 (100), 564 (16.1), 604 (11.3); <sup>1</sup>H-RMN (400 MHz, DMSO-d<sub>6</sub>),  $\delta$  (ppm) = 9.43 (8H, d, J = 6.8 Hz, Ph), 9.09 (8H, s, H-pyrrole), 8.92 (8H, d, J = 6.4 Hz, CH), 4.73 (12H, s, CH<sub>3</sub>). Characterization in accordance with previously reported [10].

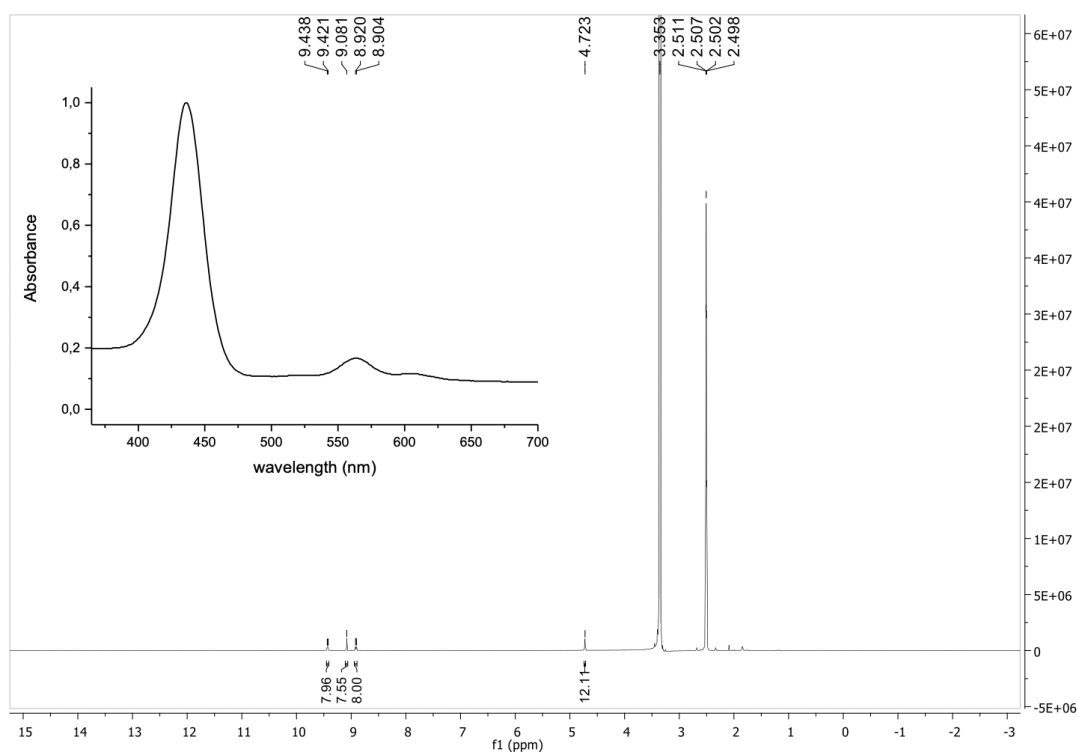

Figure S15. UV-Vis and <sup>1</sup>H-NMR of Zn(II) 5,10,15,20-tetrakis-(N-methyl-4-pyridinyl)porphyrinate tetraiodide.

**Mn(III) acetate 5,10,15,20-tetrakis-(N-methyl-4-pyridinyl)porphyrinate tetraiodide**, Yield = 18%; UV-Vis (H<sub>2</sub>O):  $\lambda_{\text{max}}$ , nm (relative absorbance, %) = 462 (100), 558 (29.0). Characterization in accordance with previously reported [11].

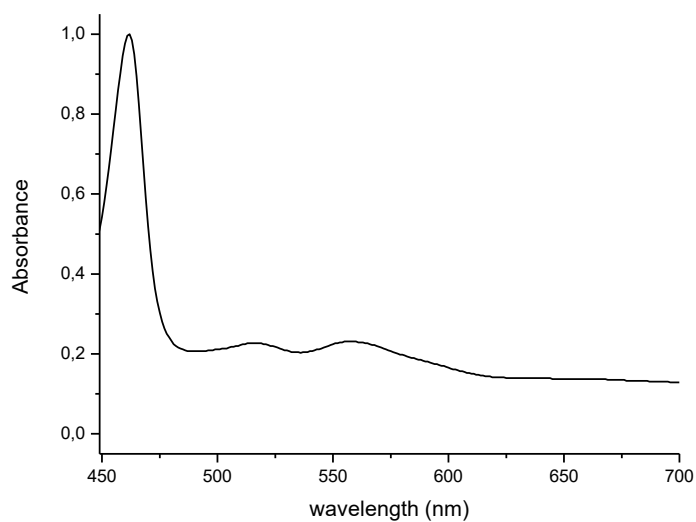

Figure S16. UV-Vis of Mn(III) 5,10,15,20-tetrakis-(N-methyl-4-pyridinyl)porphyrinate tetraiodide.

**Ni(II) 5,10,15,20-tetrakis-(N-methyl-4-pyridinyl)porphyrinate tetraiodide**, Yield = 18%; UV-Vis (H<sub>2</sub>O):  $\lambda_{\text{max}}$ , nm (relative absorbance, %) = 423 (100), 522 (25.1), 558 (24.0). Characterization in accordance with previously reported [12].

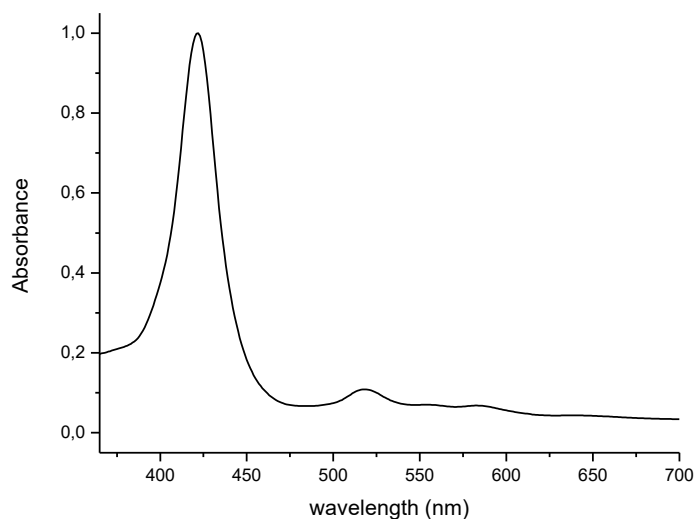

Figure S17. UV-Vis of Ni(II) 5,10,15,20-tetrakis-(N-methyl-4-pyridinyl)porphyrinate tetraiodide.

**Co(III) 5,10,15,20-tetrakis-(N-methyl-4-pyridinyl)porphyrinate tetraiodide**, Yield = 32%; UV-Vis (H<sub>2</sub>O):  $\lambda_{\text{max}}$ , nm (relative absorbance, %) = 435 (100), 548 (30.7). Characterization in accordance with previously reported [12].

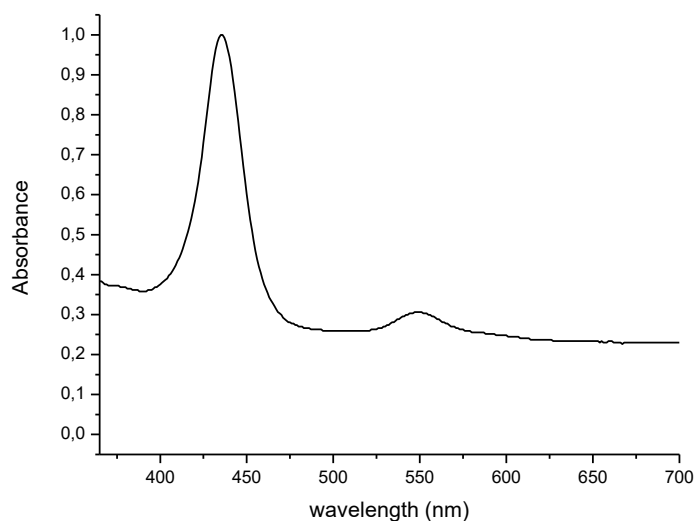

Figure S18. UV-Vis of Co(III) 5,10,15,20-tetrakis-(N-methyl-4-pyridinyl)porphyrinate tetraiodide.

**Zn(II) 5,10,15,20-tetrakis-(4-phosphonatophenyl)porphyrinate**, Yield = 32%; UV-Vis (H<sub>2</sub>O):  $\lambda_{\text{max}}$ , nm (relative absorbance, %) = 413 (100), 539 (8.5); <sup>1</sup>H-RMN (400 MHz, DMSO-d<sub>6</sub>),  $\delta$  (ppm) = 9.03 - 9.00 (8H, m, H-pyrrole), 7.75 - 7.73 (8H, m, Ph), 7.69 - 7.66 (2H, m, Ph).

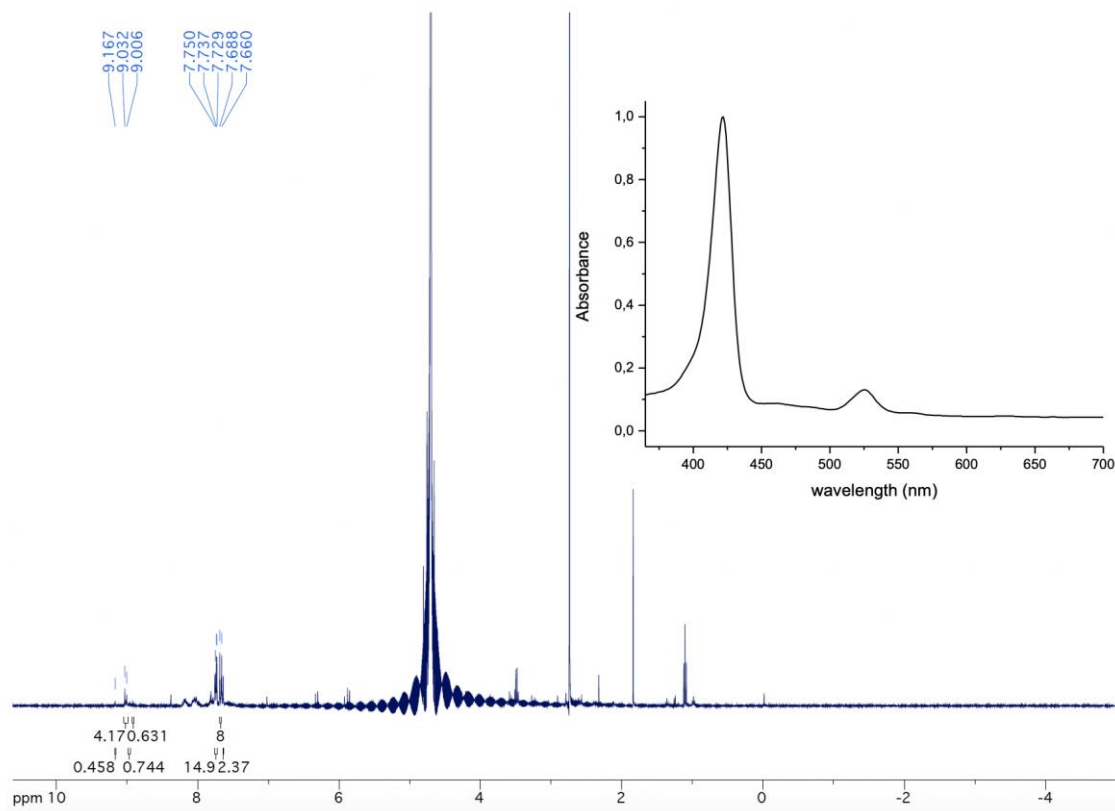

Figure S19. UV-Vis and <sup>1</sup>H-NMR of Zn(II) 5,10,15,20-tetrakis-(4-phosphonatophenyl)porphyrinate.



**Zn(II) 5,10,15,20-tetrakis-(4-carboxyphenyl)porphyrinate**, Yield = 46%; UV-Vis (CH<sub>3</sub>OH):  $\lambda_{\text{max}}$ , nm (relative absorbance, %) = 422 (100), 556 (6), 596 (4.2); <sup>1</sup>H-RMN (400 MHz, D<sub>2</sub>O),  $\delta$  (ppm) = 8.98 (8H, s, H-pyrrole), 8.25 (8H, d, J = 7.2 Hz, Ph), 7.91 (8H, d, J = 6.8 Hz, Ph), 7.80 (4H, s, CO<sub>2</sub>H) Characterization in accordance with previously reported [13].

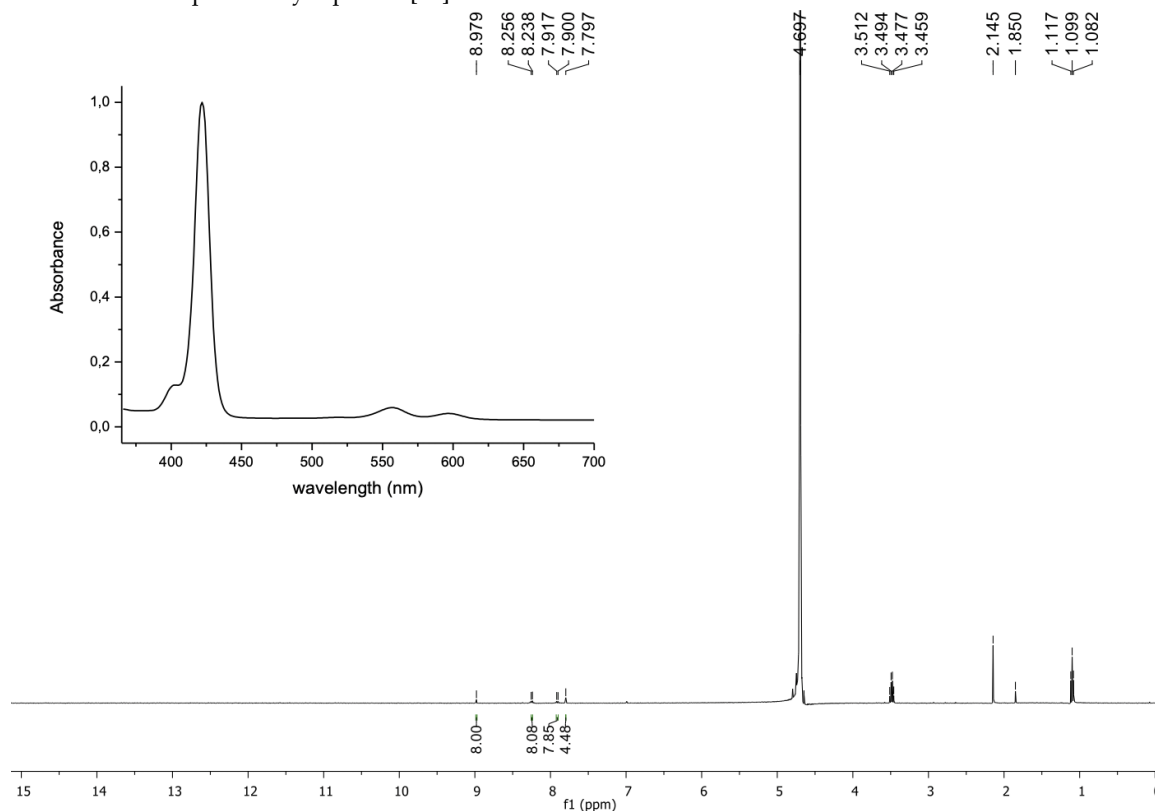

Figure S20. UV-Vis and <sup>1</sup>H-NMR of Zn(II) 5,10,15,20-tetrakis-(4-carboxyphenyl)porphyrinate.

**Zn(II) 5,10,15,20-tetrakis-(3-hydroxyphenyl)porphyrinate**, Yield = 89%; UV-Vis (CH<sub>3</sub>OH):  $\lambda_{\text{max}}$ , nm (relative absorbance, %) = 421 (100), 553 (19.3); <sup>1</sup>H-RMN (400 MHz, DMSO-d<sub>6</sub>),  $\delta$  (ppm) = 9.79 (4H, s, OH), 8.83 (8H, s, H-pyrrole), 7.62 – 7.54 (12H, m, Ph), 7.21 - 7.19(4H, m, Ph).

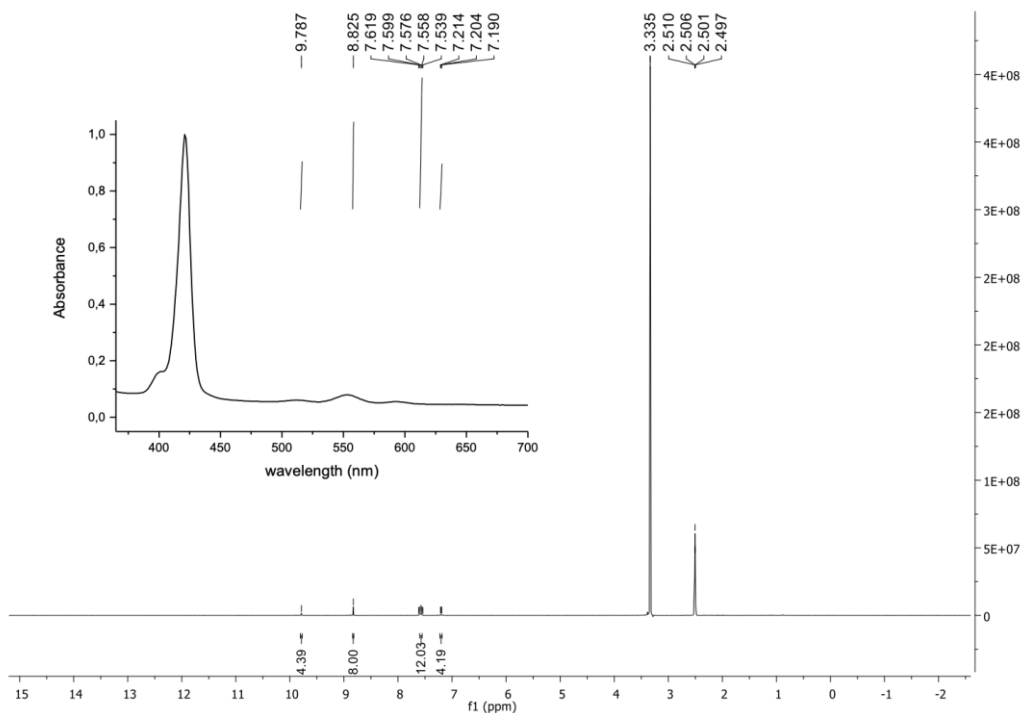

Figure S21. UV-Vis and <sup>1</sup>H-NMR of Zn(II) 5,10,15,20-tetrakis-(3-hydroxyphenyl)porphyrinate.

**Zn(II) 5,10,15,20-tetrakis-(4-sulfonatophenyl)porphyrinato tetraammonium**, Yield = 65%; UV-Vis (CH<sub>3</sub>OH):  $\lambda_{\text{max}}$ , nm (relative absorbance, %) = 420 (100), 556 (14.5) 596 (13); <sup>1</sup>H-RMN (400 MHz, DMSO-d<sub>6</sub>),  $\delta$  (ppm) = 8.80-8.76 (8H, m, H-pyrrole), 8.20-8.18 (4H, m, Ph), 8.13 (4H, d, J = 8.0 Hz, Ph), 8.02 (4H, d, J = 8.4 Hz, Ph), 7.81-7.79 (4H, m, Ph) (Characterization in accordance with previously reported [13]).

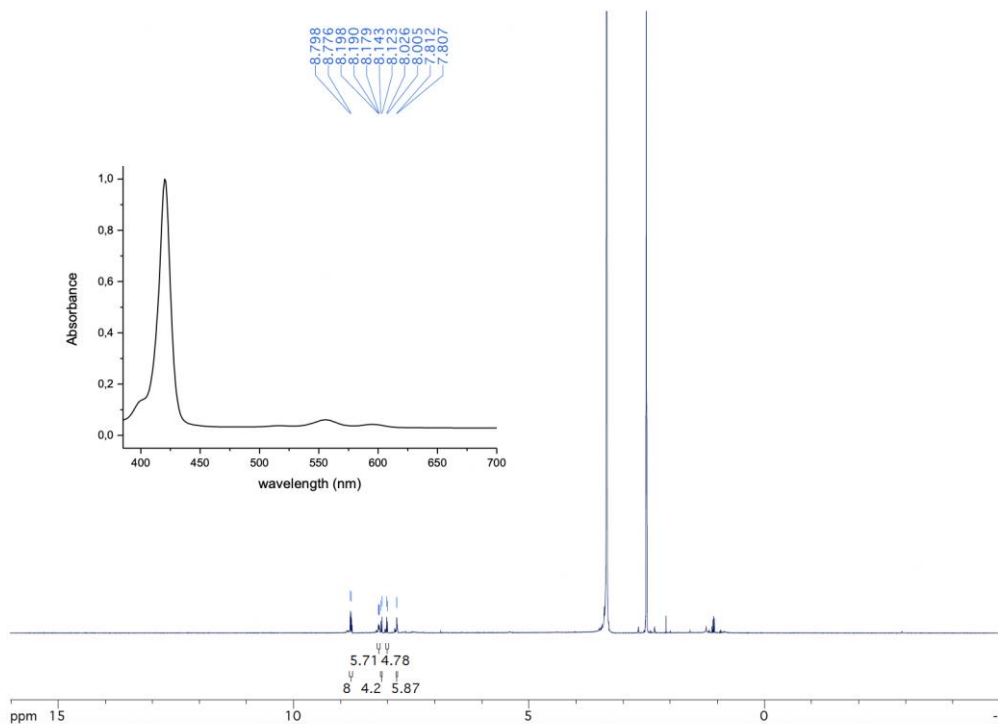

**Cu(II) 5,10,15,20-tetrakis-(4-carboxyphenyl)porphyrinate**, Yield = 46%; UV-Vis (CH<sub>3</sub>OH):  $\lambda_{\text{max}}$ , nm (relative absorbance, %) = 413 (100), 539 (10.6); HRMS (ESI);  $m/z$  = 852.1298 (M<sup>+</sup>) calculated for 852.1276 (C<sub>48</sub>H<sub>29</sub>CuN<sub>4</sub>O<sub>8</sub>). Characterization in accordance with previously reported[10].

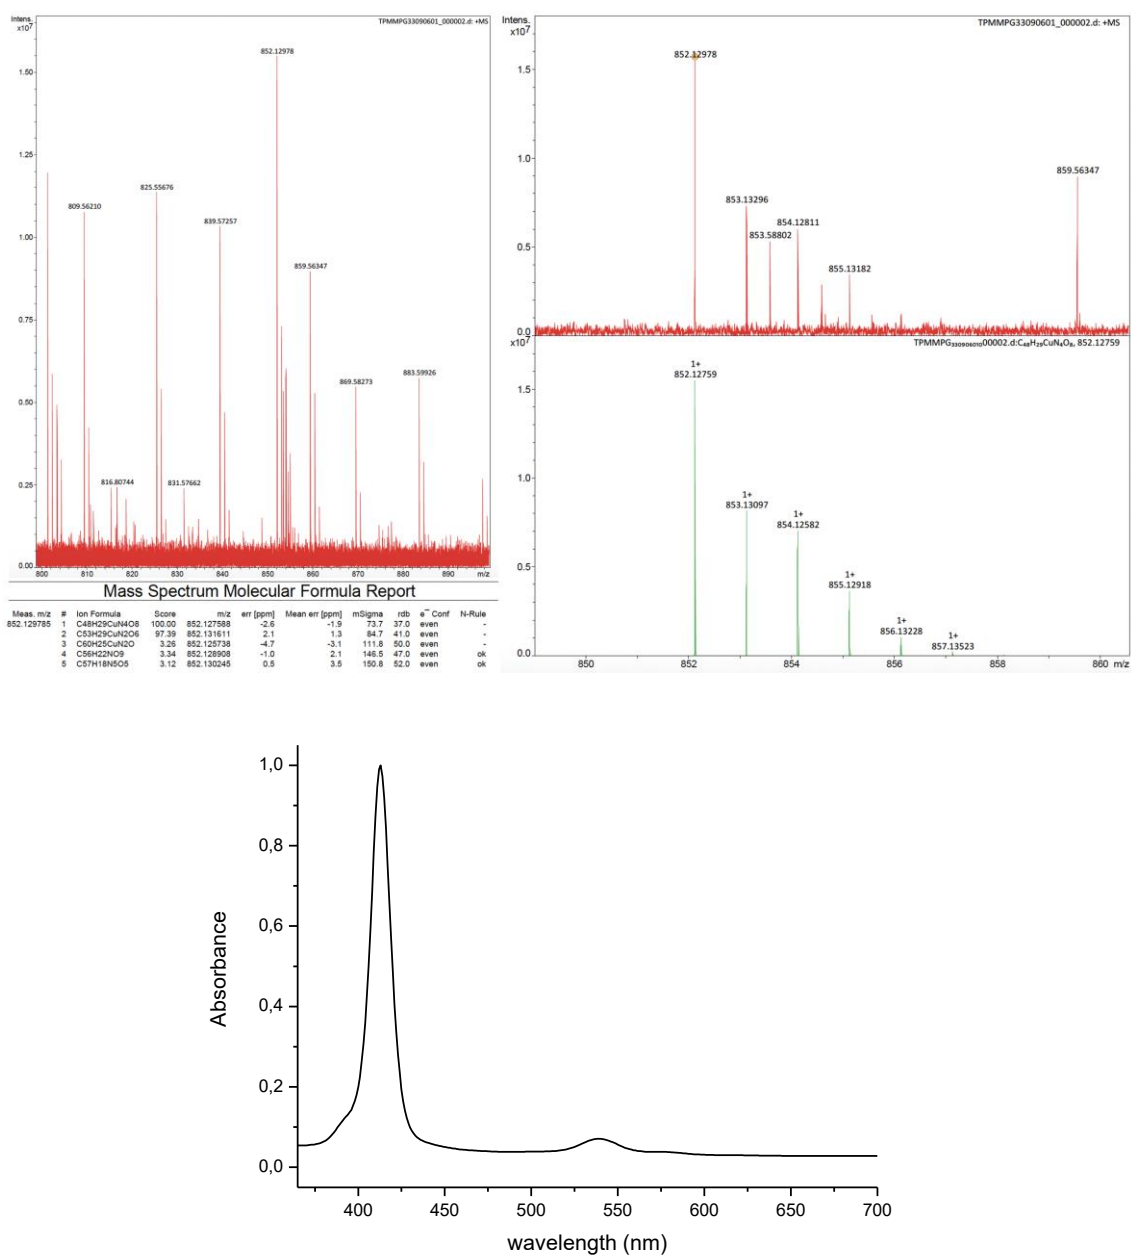

Figure S23. UV-Vis and HRMS of Cu(II) 5,10,15,20-tetrakis-(4-carboxyphenyl)porphyrinate.

## 2. Sustainability assessment

### 2.1. Experimental procedures of the reactions used for the sustainability calculations

#### 2.1.1. Synthesis of copper (II) 5,10,15,20-tetrakis-(N-methyl-4-pyridinyl)porphyrinate, CuTMePyP under mechanical action

A mixture of 5,10,15,20-tetrakis-(N-methyl-4-pyridinyl)porphyrin (50 mg, 0.042 mmol) and copper(II) acetate monohydrate (10 equiv, 84.2 mg) and two steel spheres were placed in steel jar and submitted to mechanical

action in a ball milling system (Retsch 400 MM) at 25 Hz during 60 min. The reaction product was purified through exclusion chromatography (Sephadex G-10) using water as eluent. Yield 45%.

#### 2.1.2 Synthesis of copper (II) 5,10,15,20-*tetrakis*-(3-hydroxyphenyl)porphyrinate under ultrasound

A mixture of 5,10,15,20-*tetrakis*-(3-hydroxyphenyl)porphyrin (50 mg, 0.074 mmol), copper(II) acetate monohydrate (5 equiv, 80.2 mg) and two steel spheres were placed in steel jar and submitted to mechanical action in a ball milling system (Retsch 400 MM) at 25 Hz during 30 min. After liquid-liquid extraction (ethyl acetate/water) and solvent evaporation the Cu(II) 5,10,15,20-*tetrakis*-(3-hydroxyphenyl)porphyrinate was obtained in 74% yield.

#### 2.1.3. Synthesis of copper(II) 5,10,15,20-*tetrakis*-(*N*-methyl-4-pyridinyl)porphyrinate, CuTMePyP under ultrasound

A mixture of 5,10,15,20-*tetrakis*-(*N*-methyl-4-pyridinyl)porphyrin (50 mg, 0.042 mmol) and copper(II) acetate monohydrate (1 equiv, 8.4 mg) and 1 mL of water were placed in a microwave vial (10 ml) and submerged into the ultrasound bath (1 cm depth). After 30 min, the reaction crude was purified through exclusion chromatography (Sephadex -G10) using water as eluent. After water evaporation the Cu(II) 5,10,15,20-*tetrakis*-(*N*-methyl-4-pyridinyl)porphyrinate was obtained in 53% yield.

#### 2.1.4. Synthesis of copper (II) 5,10,15,20-*tetrakis*-(3-hydroxyphenyl)porphyrinate under ultrasound

A mixture of 5,10,15,20-*tetrakis*-(3-hydroxyphenyl)porphyrin (50 mg, 0.042 mmol) and copper(II) acetate monohydrate (1 equiv, 8.4 mg) and 1 mL of NaOH (2 M) were placed in a microwave vial (10 ml) and submerged into the ultrasound bath (1 cm depth). After 30 min, the reaction crude was neutralized with HCl (1 M) and purified liquid-liquid extraction with ethyl acetate. After dried with Na<sub>2</sub>SO<sub>4</sub> and solvent evaporation the Cu(II) 5,10,15,20-*tetrakis*-(3-hydroxyphenyl)porphyrinate was obtained in 45% yield.

**Table S1.** Data for Atom Economy calculation

| reactant                               | MW (g.mol <sup>-1</sup> ) | Product     | MW      |
|----------------------------------------|---------------------------|-------------|---------|
| TMePyP                                 | 1186.44                   | Cu(TMePyP)  | 1247.97 |
| 3-OHTPP                                | 678.73                    | Cu(3-OHTPP) | 740.26  |
| Cu(OAc) <sub>2</sub> .H <sub>2</sub> O | 199.65                    |             |         |

**Table S2.** Data for E-factor calculation

| Reactant/solvents                      | MW (g.mol <sup>-1</sup> ) | Density (g/mL) | Product     | MW      |
|----------------------------------------|---------------------------|----------------|-------------|---------|
| TMePyP                                 | 1186.44                   | --             | Cu(TMePyP)  | 1247.97 |
| 3-OHTPP                                | 678.73                    | --             | Cu(3-OHTPP) | 740.26  |
| Cu(OAc) <sub>2</sub> .H <sub>2</sub> O | 199.65                    | --             |             |         |
| water                                  | 18.02                     | 1              |             |         |
| NaOH                                   | 40.00                     |                |             |         |

**Table S3.** E-factor for the synthesis of Cu(II) complexes of TMePyP

| Mechanochemistry                        |        |            |        | E-factor = 4.7  |
|-----------------------------------------|--------|------------|--------|-----------------|
| Reactant/solvents                       | m (mg) | Product    | m (mg) |                 |
| TMePyP                                  | 50     | Cu(TMePyP) | 23.6   |                 |
| Cu(OAc) <sub>2</sub> .H <sub>2</sub> O  | 84.1   |            |        |                 |
| Ultrasound                              |        |            |        | E-factor = 37.0 |
| TMePyP                                  | 50     | Cu(TMePyP) | 27.8   |                 |
| Cu(OAc) <sub>2</sub> .2H <sub>2</sub> O | 8.4    |            |        |                 |
| H <sub>2</sub> O                        | 1000   |            |        |                 |

**Table S4.** E-factor for the synthesis of Cu(II) complexes of 3-OHTPP

| Mechanochemistry                       |        |             |        | E-factor = 2.1  |
|----------------------------------------|--------|-------------|--------|-----------------|
| Reactant/solvents                      | m (mg) | Product     | m (mg) |                 |
| 3-OHTPP                                | 50     | Cu(3-OHTPP) | 40.5   |                 |
| Cu(OAc) <sub>2</sub> .H <sub>2</sub> O | 73.8   |             |        |                 |
| Ultrasound                             |        |             |        | E-factor = 27.3 |
| 3-OHTPP                                | 50     | Cu(3-OHTPP) | 40.5   |                 |
| Cu(OAc) <sub>2</sub> .H <sub>2</sub> O | 14.7   |             |        |                 |
| H <sub>2</sub> O                       | 1000   |             |        |                 |
| NaOH                                   | 80     |             |        |                 |

**Table S5.** Data for Ecoscale calculation

|                        | Cu(TMePyP)<br>Mechanochemistry | Cu(TMePyP)<br>Ultrasound | Cu(3-OHTPP)<br>Mechanochemistry | Cu(3-OHTPP)<br>Ultrasound |
|------------------------|--------------------------------|--------------------------|---------------------------------|---------------------------|
| Parameter              | Penalty points                 |                          |                                 |                           |
| 1. Yield               | 27.5                           | 23.5                     | 13                              | 13                        |
| 2. Price of components | 5                              | 5                        | 5                               | 5                         |
| 3. Safety              | 5                              | 5                        | 5                               | 10                        |
| 4. Technical Setup     | 2                              | 2                        | 2                               | 2                         |
| 5. Temperature/time    | 0                              | 0                        | 0                               | 0                         |
| 6. Workup/Purification | 10                             | 10                       | 3                               | 3                         |
| Total penalty points   | 49.5                           | 45.5                     | 28                              | 33                        |
| Ecoscale               | 50.5                           | 54.5                     | 72                              | 67                        |

## References

- Kumar, A.; Maji, S.; Dubey, P.; Abhilash, G. J.; Pandey, S.; Sarkar, S., One-pot general synthesis of metalloporphyrins. *Tetrahedron Lett.* **2007**, 48, (41), 7287-7290. DOI:10.1016/j.tetlet.2007.08.046.
- Sousa, J. F. M.; Pina, J.; Gomes, C.; Dias, L. D.; Pereira, M. M.; Murtinho, D.; Dias, P.; Azevedo, J.; Mendes, A.; Seixas de Melo, J. S.; Pais, A. A. C. C.; Pineiro, M.; Valente, A. J. M., Transport and photophysical studies on porphyrin-containing sulfonated poly(etheretherketone) composite membranes. *Mater. Today Commun.* **2021**, 29, 102781 DOI: 10.1016/j.mtcomm.2021.102781.
- Jain, N.; Kumar, A.; Chauhan, S. M. S., Synthesis of Transition Metal Porphyrins from Free-Base 5,10,15,20-Tetraarylporphyrins Under Microwave Irradiation in Ionic Liquids. *Synth. Commun.* **2005**, 35, (9), 1223-1230. DOI: 10.1081/scc-200054823.
- Ralphs, K.; Zhang, C.; James, S. L., Solventless mechanochemical metallation of porphyrins. *Green Chem.* **2017**, 19, (1), 102-105. DOI: 10.1039/c6gc02420c.
- Sankar, M.; Bhyrappa, P.; Varghese, B.; Praneeth, K. K.; Vijayanthimala, G., Meso-tetrakis(3',5'-di-substituted-phenyl)porphyrins: structural, electrochemical redox and axial ligation properties. *J. Porphyr. Phthalocyan.* **2012**, 09, (06), 413-422. DOI: 10.1142/s1088424605000514.
- Chen, E. X.; Qiu, M.; Zhang, Y. F.; Zhu, Y. S.; Liu, L. Y.; Sun, Y. Y.; Bu, X.; Zhang, J.; Lin, Q., Acid and Base Resistant Zirconium Polyphenolate-Metalloporphyrin Scaffolds for Efficient CO<sub>2</sub> Photoreduction. *Adv Mater* **2018**, 30, (2), 1704388. DOI: 10.1002/adma.201704388.
- Smith, K. M., *Porphyrins and metalloporphyrins* Elsevier Scientific Publishing Company: Amsterdam, 1975.
- Joseph, R.; Kumar, K. G., Electrochemical sensing of acyclovir at a gold electrode modified with 2-mercaptobenzothiazole-[5,10,15,20-tetrakis-(3-methoxy-4-hydroxyphenyl)porphyrinato]copper(II). *Anal Sci* **2011**, 27, (1), 67-72. DOI: 10.2116/analsci.27.67.
- Wyřębek, P.; Ostrowski, S., Synthesis of some  $\beta$ -nitro-meso-tetraphenylporphyrin derivatives. *Journal of Porphyrins and Phthalocyanines* **2012**, 11, (11), 822-828, 10.1142/s1088424607000941.

10. Pasternack, R. F.; Francesconi, L.; Raff, D.; Spiro, E., Aggregation of Nickel(II), Copper(II), and Zinc(II) Derivatives of Water-Soluble Porphyrins. *Inorg. Chem.* **1973**, 12, (11), 2606-2611. DOI: 10.1021/ic50129a023
11. Casas, C.; Lacey, C. J.; Meunier, B., Preparation of hybrid "DNA cleaver-oligonucleotide" molecules based on a metallotris(methylpyridiniumyl)porphyrin motif. *Bioconjug Chem* **1993**, 4, (5), 366-71. DOI: 10.1021/bc00023a011.
12. Pasternack, R. F.; Spiro, E. G.; Teach, M., Solution properties of nickel(II) tetra(4-N-methylpyridyl) porphine and the influence of acetone, pyridine and imidazole. *Journal of Inorganic and Nuclear Chemistry* **1974**, 36, (3), 599-606. DOI: 10.1016/0022-1902(74)80120-x.
13. Manna, B. K.; Sen, D.; Bera, S. C.; Rohatgi-Mukherjee, K. K., Spectral and flash kinetic studies of water-soluble zinc porphyrins in poly-N-vinyl-2-pyrrolidone matrix. *Spectrochimica Acta Part A: Molecular Spectroscopy* **1992**, 48, (11-12), 1657-1669. DOI: 10.1016/0584-8539(92)80239-s.
